# Supplementary material for: Influence of the Type of Nanofillers on the Properties of Composites Used in Dentistry and 3D Printing
Source: MDPI journal article supplement (doi:10.3390/ijms241310549), 2023-06-23
Supplement: s1 [file s1]

# Influence of the type of nanofillers on the properties of composites used in dentistry and 3D printing

Małgorzata Noworyta <sup>1</sup>, Monika Topa-Skwarczyńska <sup>1</sup>, Paweł Jamróz <sup>1</sup>, Dawid Oksiuta <sup>2</sup>, Małgorzata Tyszką-Czochara <sup>3</sup>, Klaudia Trembecka -Wójciga <sup>4</sup>, Joanna Ortyl <sup>1,5,6\*</sup>

<sup>1</sup> Cracow University of Technology, Faculty of Chemical Engineering and Technology, Warszawska 24, 31-155 Cracow, Poland

<sup>2</sup> Cracow University of Technology, Faculty of Mechanical Engineering, Jana Pawła II 37, 31-864 Cracow, Poland

<sup>3</sup> Faculty of Pharmacy, Jagiellonian University Medical College, Medyczna 9, 30-688 Kraków, Poland

<sup>4</sup> Institute of Metallurgy and Materials Science, Polish Academy of Sciences, Reymonta 25, 30-059 Cracow, Poland

<sup>5</sup> Photo4Chem Ltd., Lea 114, 31-133 Cracow, Poland

<sup>6</sup> Photo HiTech Ltd., Bobrzyńskiego 14, 30-348 Cracow, Poland

\* Correspondence: [jortyl@chemia.pk.edu.pl](mailto:jortyl@chemia.pk.edu.pl)

The dependence of the viscosity of radical-reactive compositions on the shear rate for a constant temperature of 25°C.

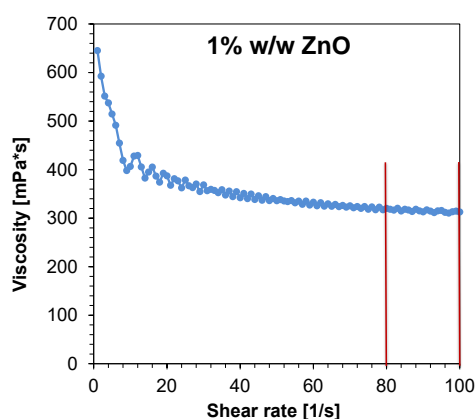

**Figure S1.** Dependence of viscosity, nanocomposition polymerizing by radical mechanism with 1% wt. ZnO on shear rate for a constant temperature of 25°C.

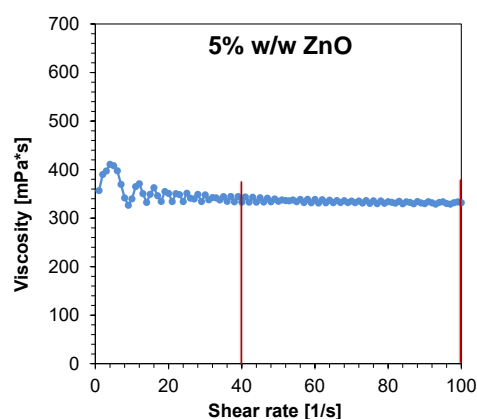

**Figure S2.** Dependence of viscosity, nanocomposition polymerizing by radical mechanism with 5% wt. ZnO on shear rate for a constant temperature of 25°C.

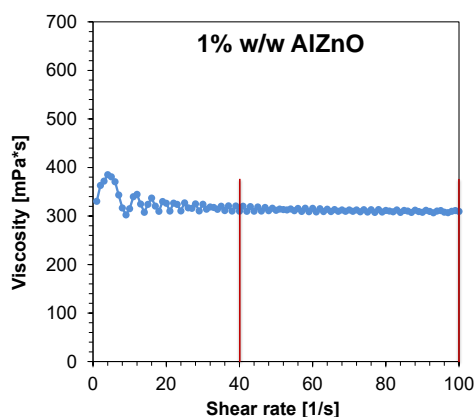

**Figure S3.** Dependence of viscosity, nanocomposition polymerizing by radical mechanism with 1% wt. AlZnO on shear rate for a constant temperature of 25°C.

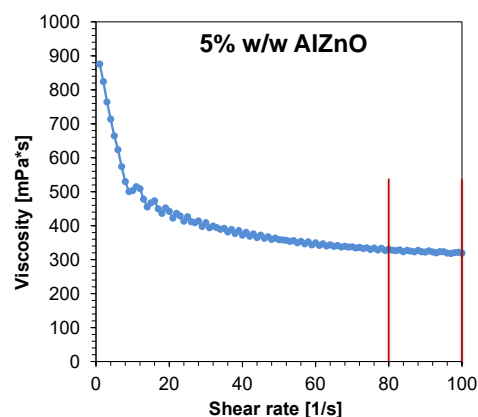

**Figure S4.** Dependence of viscosity, nanocomposition polymerizing by radical mechanism with 5% wt. AlZnO on shear rate for a constant temperature of 25°C.

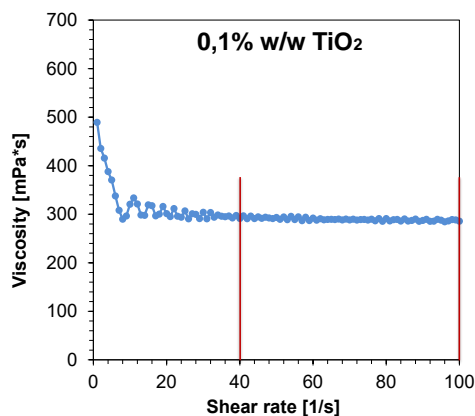

**Figure S5.** Dependence of viscosity, nanocomposition polymerizing by radical mechanism with 0,1% wt. TiO<sub>2</sub> on shear rate for a constant temperature of 25°C.

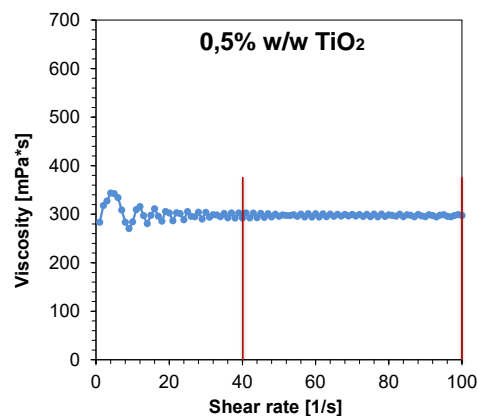

**Figure S6.** Dependence of viscosity, nanocomposition polymerizing by radical mechanism with 0,5% wt. TiO<sub>2</sub> on shear rate for a constant temperature of 25°C.

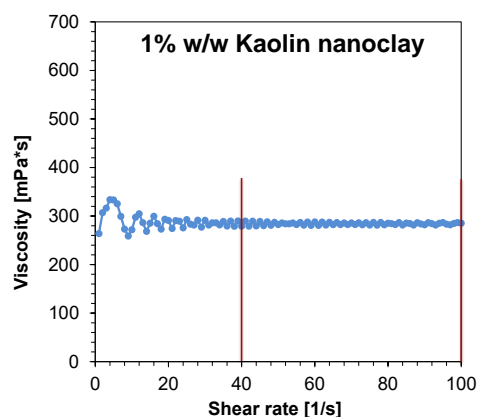

**Figure S7.** Dependence of viscosity, nanocomposition polymerizing by radical mechanism with 1% wt. Kaolin nanoclay on shear rate for a constant temperature of 25°C.

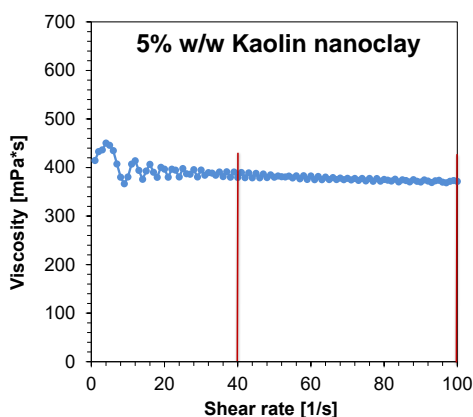

**Figure S8.** Dependence of viscosity, nanocomposition polymerizing by radical mechanism with 5% wt. Kaolin nanoclay on shear rate for a constant temperature of 25°C.

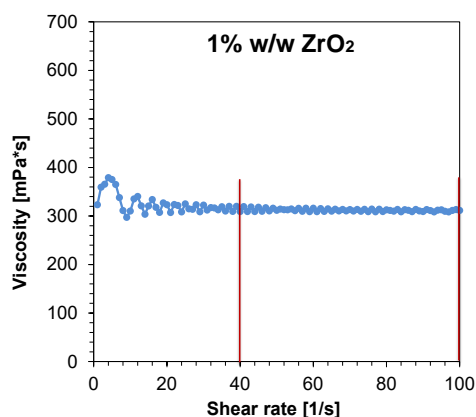

**Figure S9.** Dependence of viscosity, nanocomposition polymerizing by radical mechanism with 1% wt.  $\text{ZrO}_2$  on shear rate for a constant temperature of 25°C.

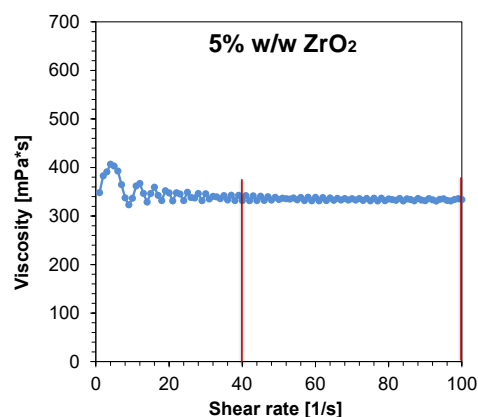

**Figure S10.** Dependence of viscosity, nanocomposition polymerizing by radical mechanism with 5% wt.  $\text{ZrO}_2$  on shear rate for a constant temperature of 25°C.

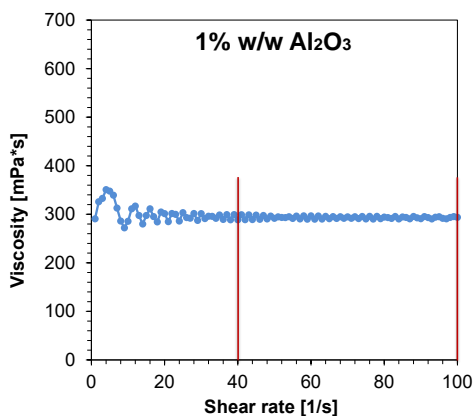

**Figure S11.** Dependence of viscosity, nanocomposition polymerizing by radical mechanism with 1% wt.  $\text{Al}_2\text{O}_3$  on shear rate for a constant temperature of 25°C.

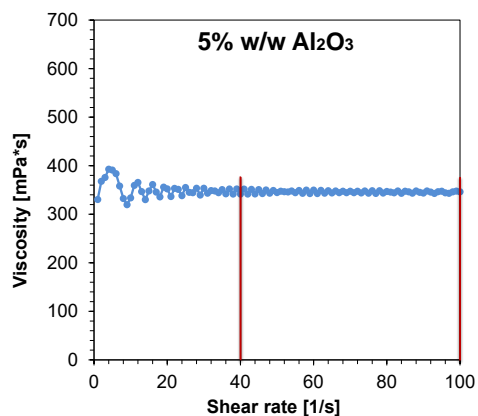

**Figure S12.** Dependence of viscosity, nanocomposition polymerizing by radical mechanism with 5% wt.  $\text{Al}_2\text{O}_3$  on shear rate for a constant temperature of 25°C.

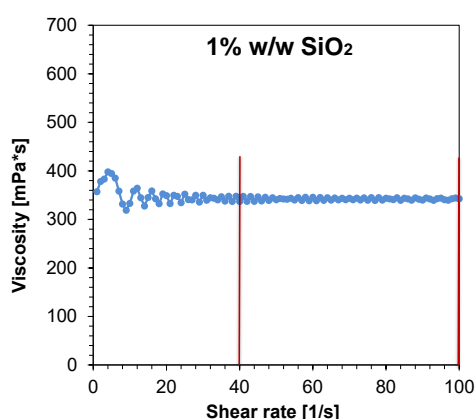

**Figure S13.** Dependence of viscosity, nanocomposition polymerizing by radical mechanism with 1% wt.  $\text{SiO}_2$  on shear rate for a constant temperature of 25°C.

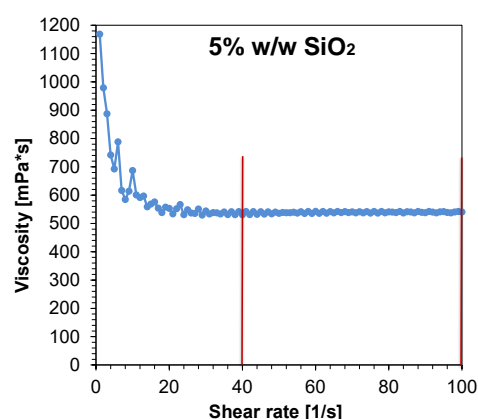

**Figure S14.** Dependence of viscosity, nanocomposition polymerizing by radical mechanism with 5% wt.  $\text{SiO}_2$  on shear rate for a constant temperature of 25°C.

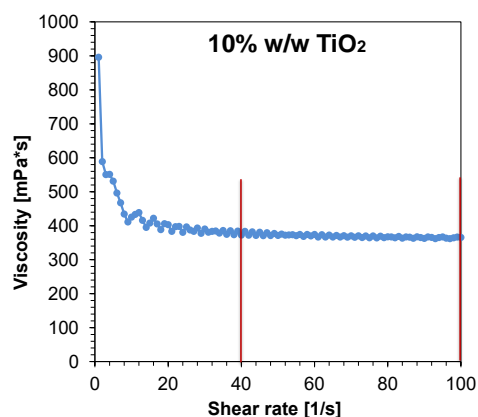

**Figure S15.** Dependence of viscosity, nanocomposition polymerizing by radical mechanism with 10% wt.  $\text{TiO}_2$  on shear rate for a constant temperature of 25°C.

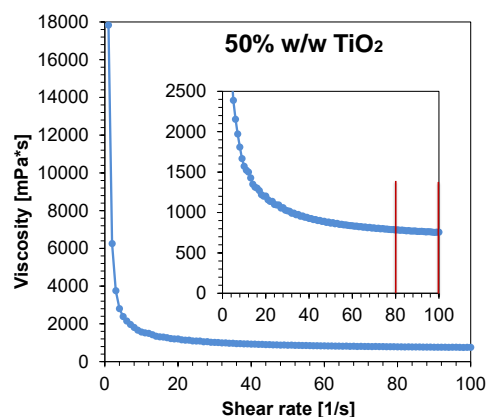

**Figure S16.** Dependence of viscosity, nanocomposition polymerizing by radical mechanism with 50% wt.  $\text{TiO}_2$  on shear rate for a constant temperature of 25°C.

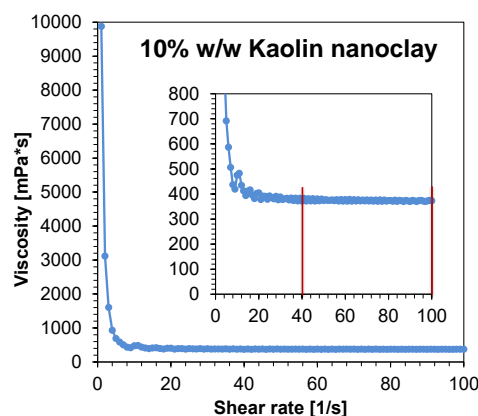

**Figure S17.** Dependence of viscosity, nanocomposition polymerizing by radical mechanism with 10% wt. Kaolin nanoclay on shear rate for a constant temperature of 25°C.

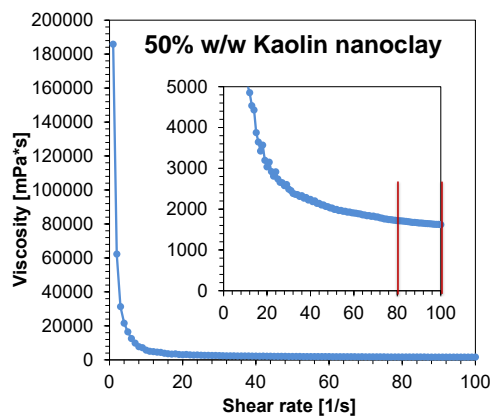

**Figure S18.** Dependence of viscosity, nanocomposition polymerizing by radical mechanism with 50% wt. Kaolin nanoclay on shear rate for a constant temperature of 25°C.

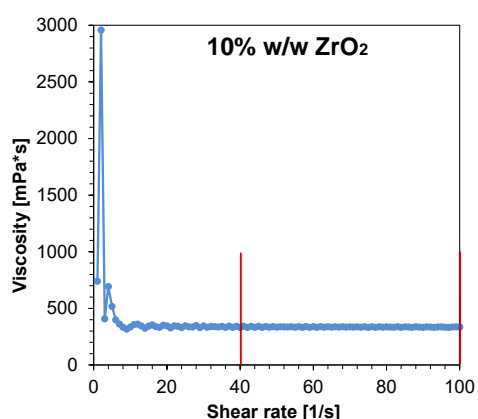

**Figure S19.** Dependence of viscosity, nanocomposition polymerizing by radical mechanism with 10% wt.  $\text{ZrO}_2$  on shear rate for a constant temperature of 25°C.

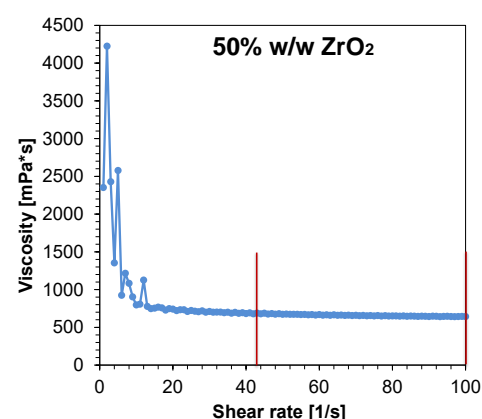

**Figure S20.** Dependence of viscosity, nanocomposition polymerizing by radical mechanism with 50% wt.  $\text{ZrO}_2$  on shear rate for a constant temperature of 25°C.

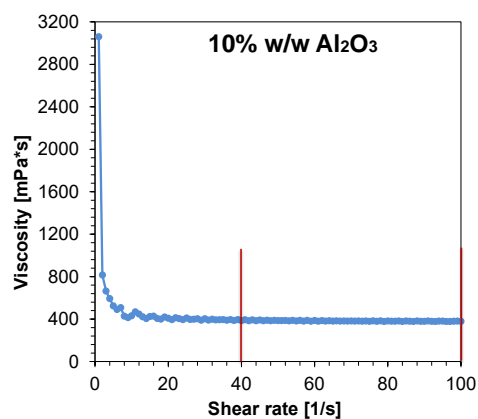

**Figure S21.** Dependence of viscosity, nanocomposition polymerizing by radical mechanism with 10% wt.  $\text{Al}_2\text{O}_3$  on shear rate for a constant temperature of 25°C.

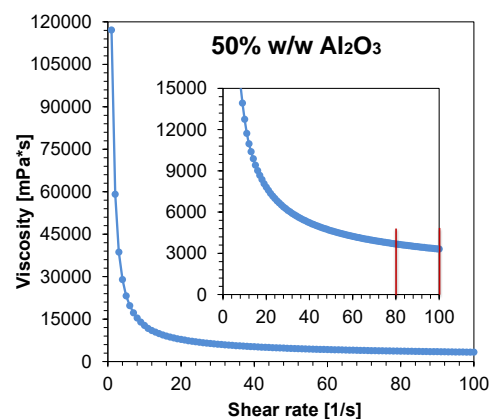

**Figure S22.** Dependence of viscosity, nanocomposition polymerizing by radical mechanism with 50% wt.  $\text{Al}_2\text{O}_3$  on shear rate for a constant temperature of 25°C.

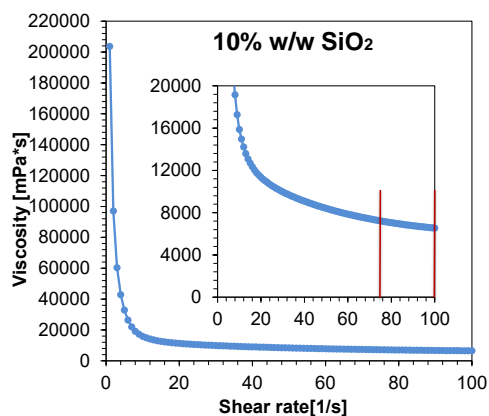

**Figure S23.** Dependence of viscosity, nanocomposition polymerizing by radical mechanism with 10% wt.  $\text{SiO}_2$  on shear rate for a constant temperature of 25°C.

The dependence of the viscosity of cationic-reactive compositions on the shear rate for a constant temperature of 25°C.

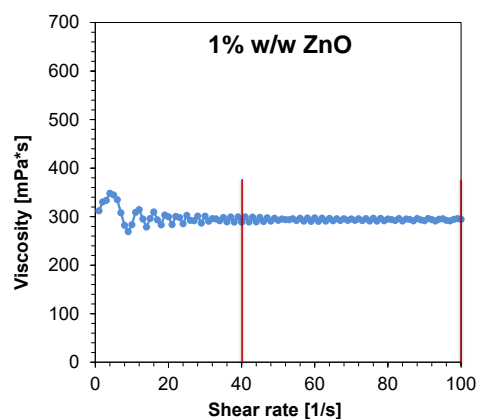

**Figure S24.** Dependence of viscosity, nanocomposition polymerizing by cationic mechanism with 1% wt. ZnO on shear rate for a constant temperature of 25°C.

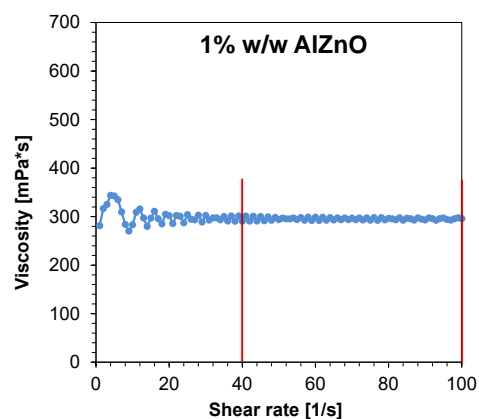

**Figure S25.** Dependence of viscosity, nanocomposition polymerizing by cationic mechanism with 1% wt. AlZnO on shear rate for a constant temperature of 25°C.

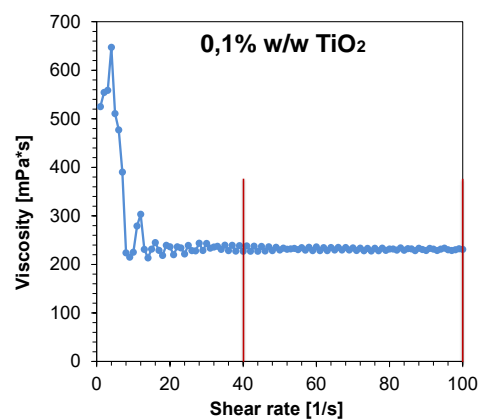

**Figure S26.** Dependence of viscosity, nanocomposition polymerizing by cationic mechanism with 0,1% wt. TiO<sub>2</sub> on shear rate for a constant temperature of 25°C.

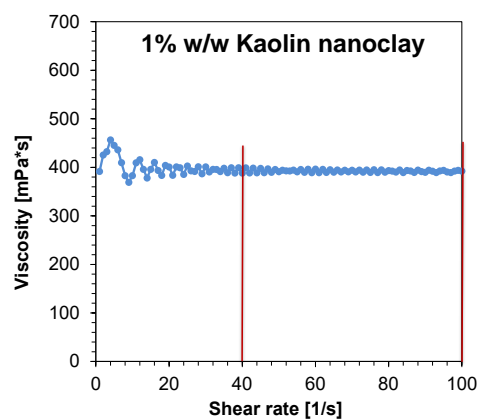

**Figure S27.** Dependence of viscosity, nanocomposition polymerizing by cationic mechanism with 1% wt. Kaolin nanoclay on shear rate for a constant temperature of 25°C.

**Conversion rates of the photopolymerization process carried out for layers of 25  $\mu\text{m}$  radical-reactive compositions containing different weight concentrations of nano-additives.**

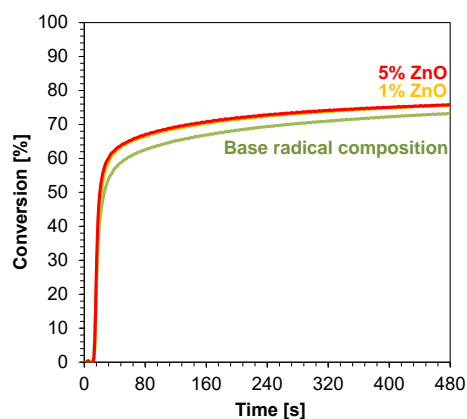

**Figure S28.** Kinetic profiles for compositions consisting of 1% wt. and 5% wt. ZnO for a radical reacting system and a layer thickness of 25  $\mu\text{m}$ .

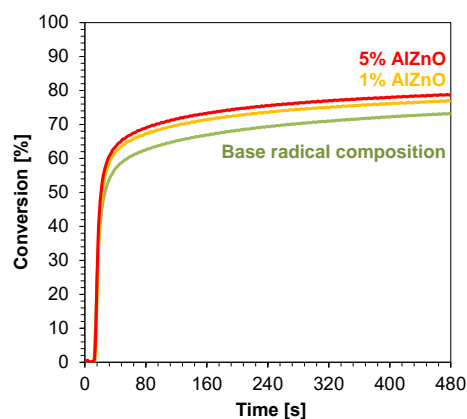

**Figure S29.** Kinetic profiles for compositions consisting of 1% wt. and 5% wt. AlZnO for a radical reacting system and a layer thickness of 25  $\mu\text{m}$ .

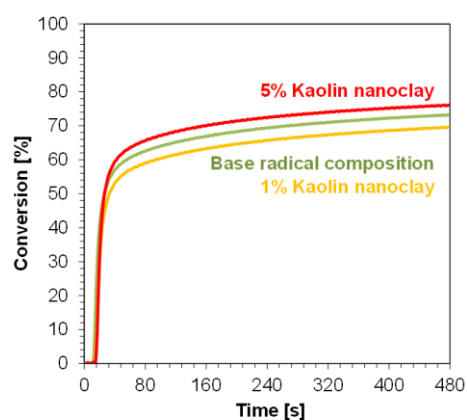

**Figure S30.** Kinetic profiles for compositions consisting of 1% wt. and 5% wt. Kaolin nanoclay for a radical reacting system and a layer thickness of 25  $\mu\text{m}$ .

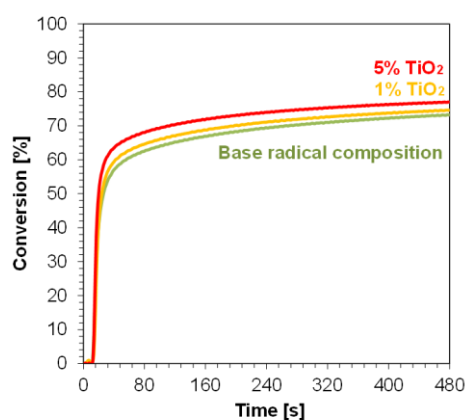

**Figure S31.** Kinetic profiles for compositions consisting of 1% wt. and 5% wt. TiO<sub>2</sub> for a radical reacting system and a layer thickness of 25  $\mu\text{m}$ .

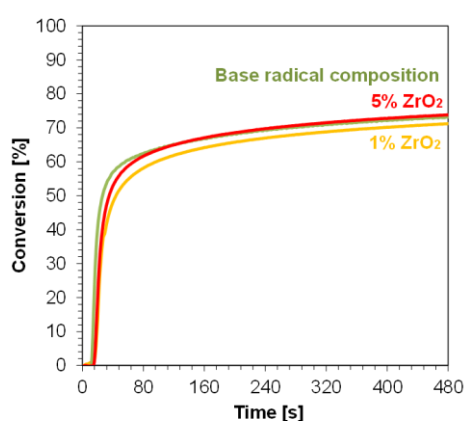

**Figure S32.** Kinetic profiles for compositions consisting of 1% wt. and 5% wt. ZrO<sub>2</sub> for a radical reacting system and a layer thickness of 25  $\mu\text{m}$ .

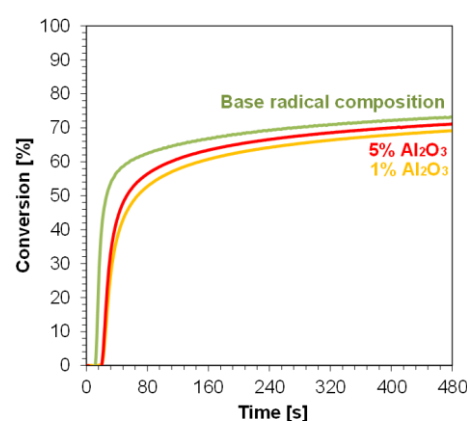

**Figure S33.** Kinetic profiles for compositions consisting of 1% wt. and 5% wt. Al<sub>2</sub>O<sub>3</sub> for a radical reacting system and a layer thickness of 25  $\mu\text{m}$ .

**Conversion rates of the photopolymerization process carried out for layers of 1,4 mm radical-reactive compositions containing different weight concentrations of nano-additives.**

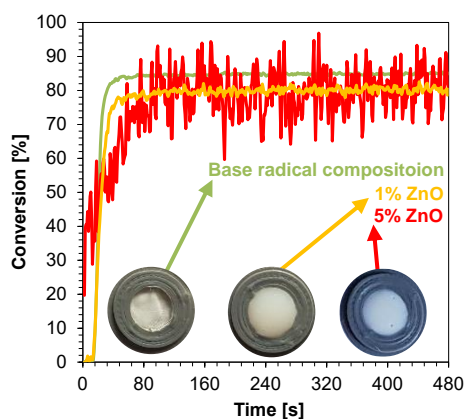

**Figure S34.** Kinetic profiles for compositions consisting of 1% wt. and 5% wt. ZnO for a radical reacting system and a layer thickness of 1,4 mm.

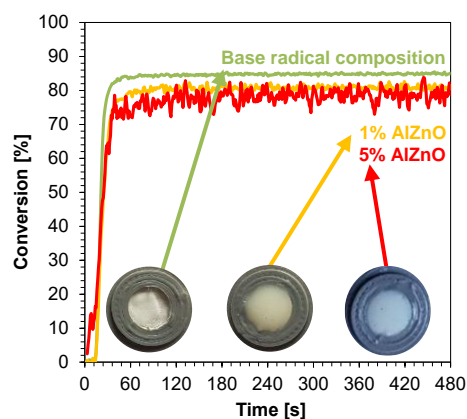

**Figure S35.** Kinetic profiles for compositions consisting of 1% wt. and 5% wt. AlZnO for a radical reacting system and a layer thickness of 1,4 mm.

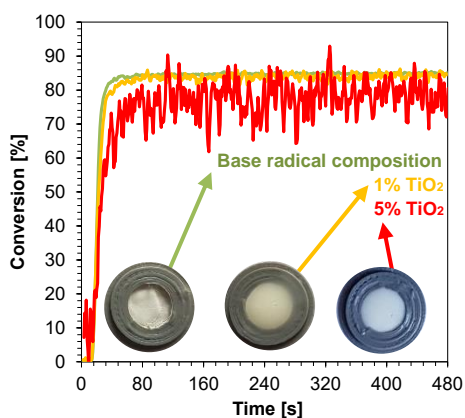

**Figure S36.** Kinetic profiles for compositions consisting of 0,1% wt. and 0,5% wt. TiO<sub>2</sub> for a radical reacting system and a layer thickness of 1,4 mm.

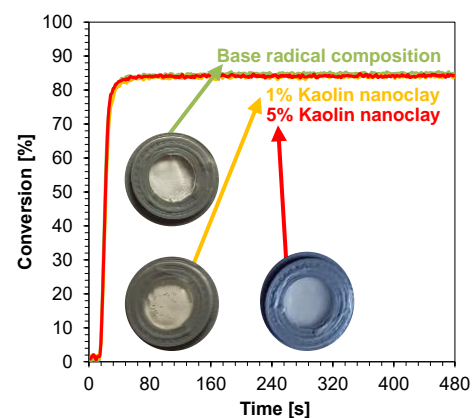

**Figure S37.** Kinetic profiles for compositions consisting of 1% wt. and 5% wt. Kaolin nanoclay for a radical reacting system and a layer thickness of 1,4 mm.

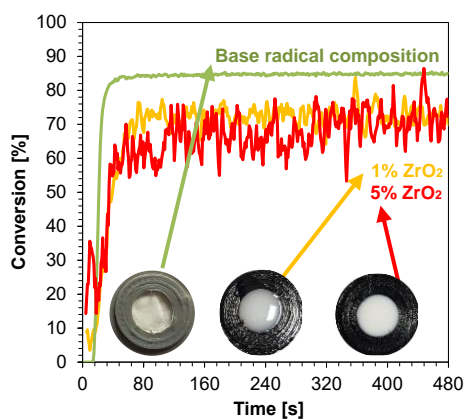

**Figure S38.** Kinetic profiles for compositions consisting of 1% wt. and 5% wt. ZrO<sub>2</sub> for a radical reacting system and a layer thickness of 1,4 mm.

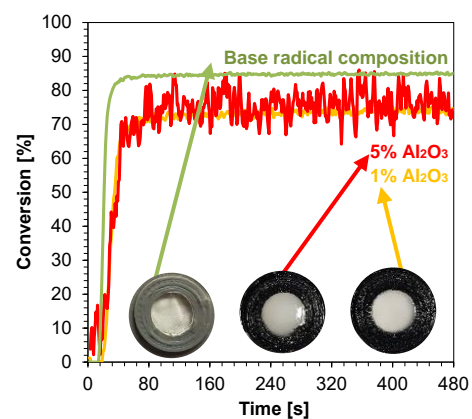

**Figure S39.** Kinetic profiles for compositions consisting of 1% wt. and 5% wt. Al<sub>2</sub>O<sub>3</sub> for a radical reacting system and a layer thickness of 1,4 mm.



**Changes in FT-IR spectra showing band decay at  $1634\text{ cm}^{-1}$  wavenumber monitored for a radical polymerizing composition for a test layer thickness of  $25\text{ }\mu\text{m}$ .**

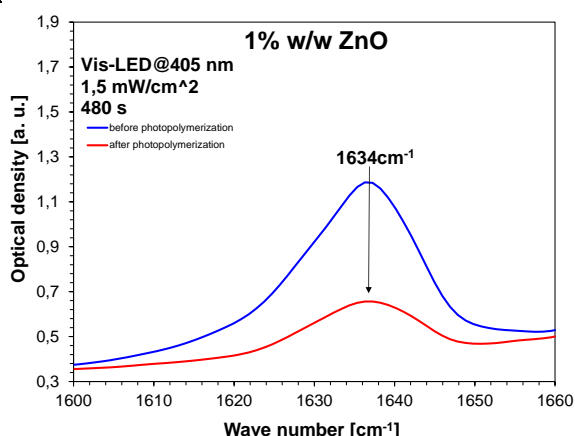

**Figure S40.** FT-IR spectra recorded before and after photopolymerization of nanocomposition polymerizing according to radical mechanism with 1% wt. ZnO for a  $25\text{ }\mu\text{m}$  thick layer of the sample.

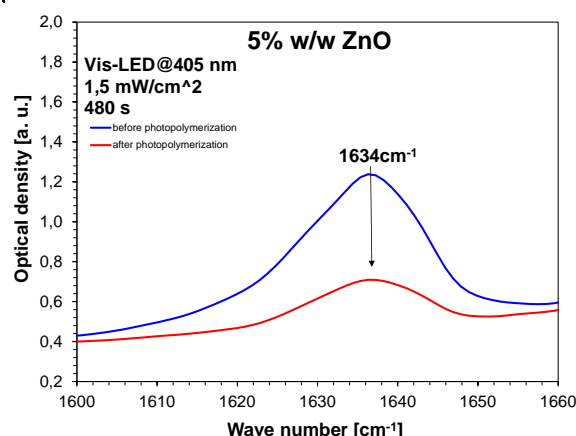

**Figure S41.** FT-IR spectra recorded before and after photopolymerization of nanocomposition polymerizing according to radical mechanism with 5% wt. ZnO for a  $25\text{ }\mu\text{m}$  thick layer of the sample.

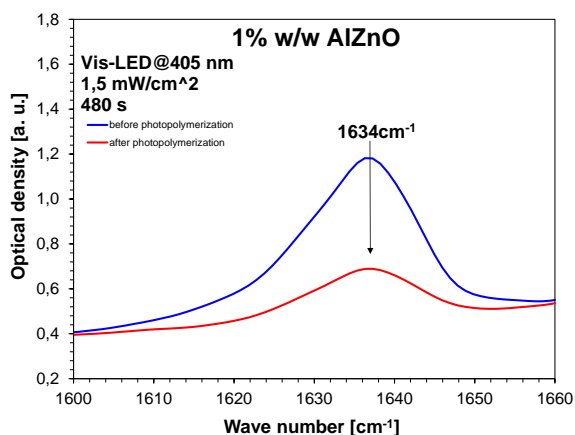

**Figure S42.** FT-IR spectra recorded before and after photopolymerization of nanocomposition polymerizing according to radical mechanism with 1% wt. AlZnO for a  $25\text{ }\mu\text{m}$  thick layer of the sample.

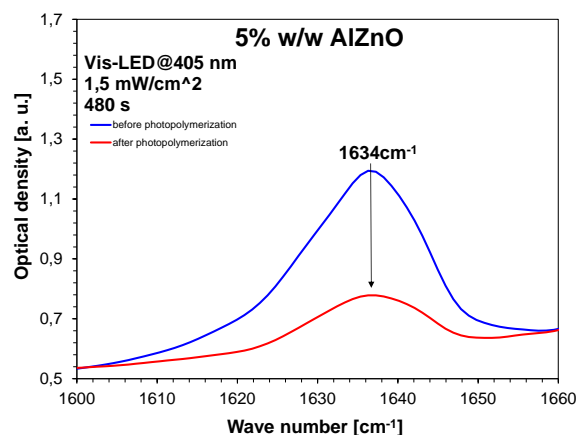

**Figure S43.** FT-IR spectra recorded before and after photopolymerization of nanocomposition polymerizing according to radical mechanism with 5% wt. AlZnO for a  $25\text{ }\mu\text{m}$  thick layer of the sample.

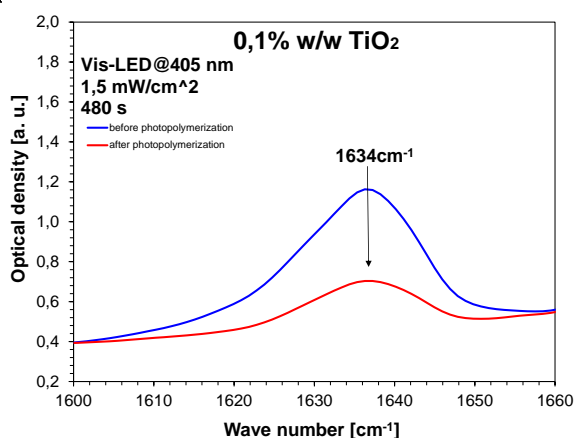

**Figure S44.** FT-IR spectra recorded before and after photopolymerization of nanocomposition polymerizing according to radical mechanism with 0,1% wt.  $\text{TiO}_2$  for a  $25\text{ }\mu\text{m}$  thick layer of the sample.

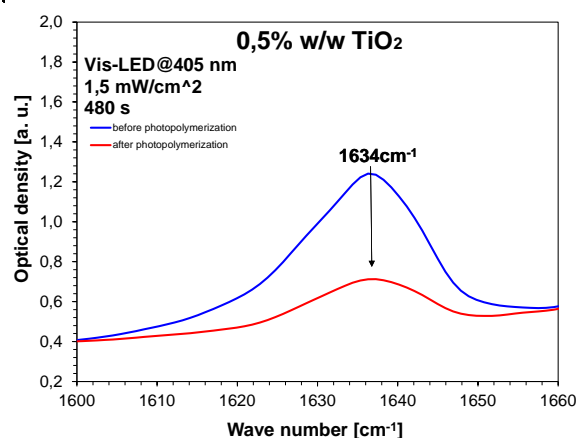

**Figure S45.** FT-IR spectra recorded before and after photopolymerization of nanocomposition polymerizing according to radical mechanism with 0,5% wt.  $\text{TiO}_2$  for a  $25\text{ }\mu\text{m}$  thick layer of the sample.

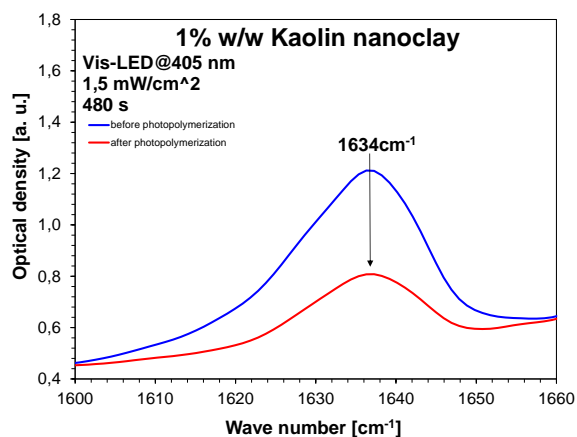

**Figure S46.** FT-IR spectra recorded before and after photopolymerization of nanocomposition polymerizing according to radical mechanism with 1% wt. Kaolin nanoclay for a 25  $\mu\text{m}$  thick layer of the sample.

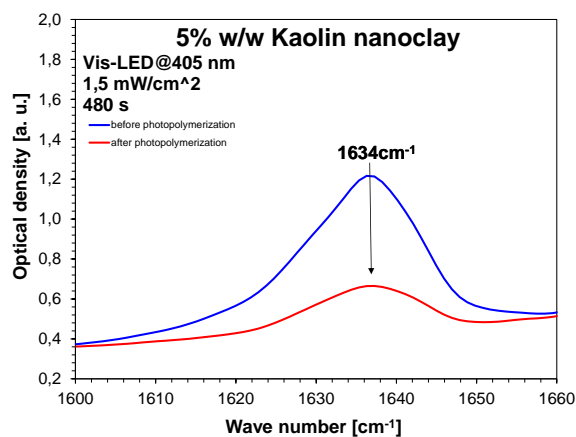

**Figure S47.** FT-IR spectra recorded before and after photopolymerization of nanocomposition polymerizing according to radical mechanism with 5% wt. Kaolin nanoclay for a 25  $\mu\text{m}$  thick layer of the sample.

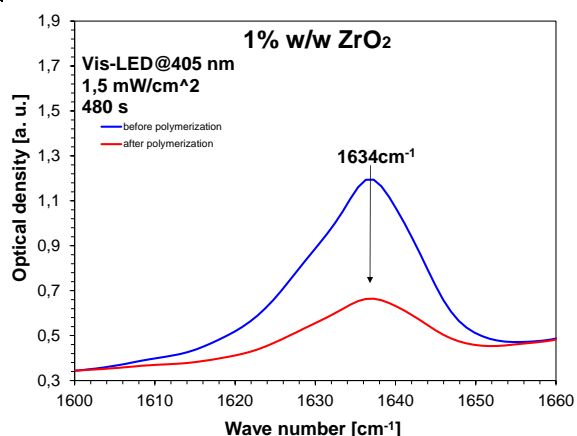

**Figure S48.** FT-IR spectra recorded before and after photopolymerization of nanocomposition polymerizing according to radical mechanism with 1% wt.  $\text{ZrO}_2$  for a 25  $\mu\text{m}$  thick layer of the sample.

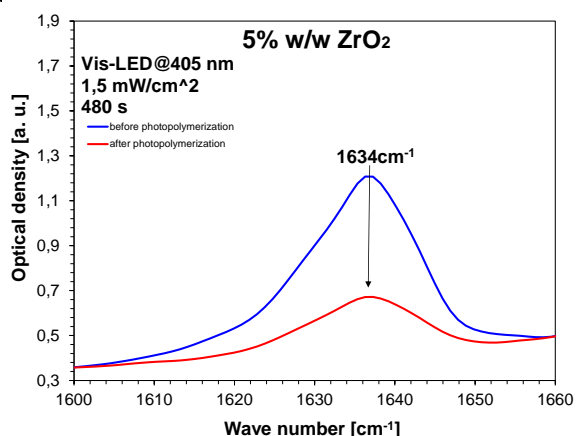

**Figure S49.** FT-IR spectra recorded before and after photopolymerization of nanocomposition polymerizing according to radical mechanism with 5% wt.  $\text{ZrO}_2$  for a 25  $\mu\text{m}$  thick layer of the sample.

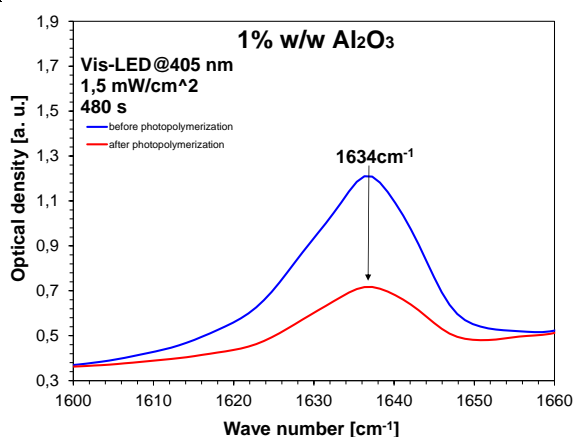

**Figure S50.** FT-IR spectra recorded before and after photopolymerization of nanocomposition polymerizing according to radical mechanism with 1% wt.  $\text{Al}_2\text{O}_3$  for a 25  $\mu\text{m}$  thick layer of the sample.

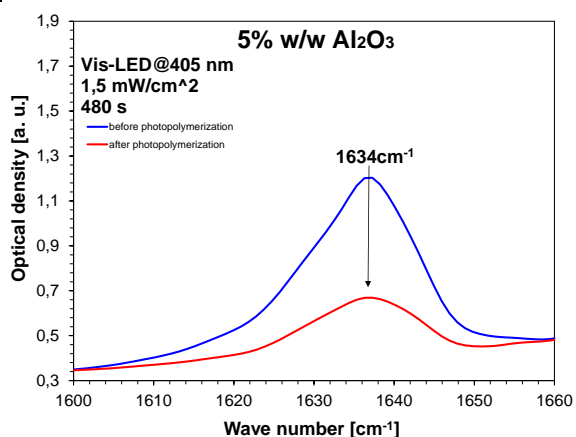

**Figure S51.** FT-IR spectra recorded before and after photopolymerization of nanocomposition polymerizing according to radical mechanism with 5% wt.  $\text{Al}_2\text{O}_3$  for a 25  $\mu\text{m}$  thick layer of the sample.

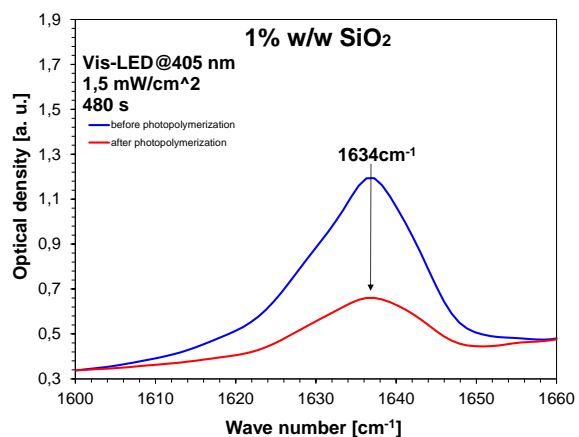

**Figure S52.** FT-IR spectra recorded before and after photopolymerization of nanocomposition polymerizing according to radical mechanism with 1% wt. SiO<sub>2</sub> for a 25  $\mu$ m thick layer of the sample.

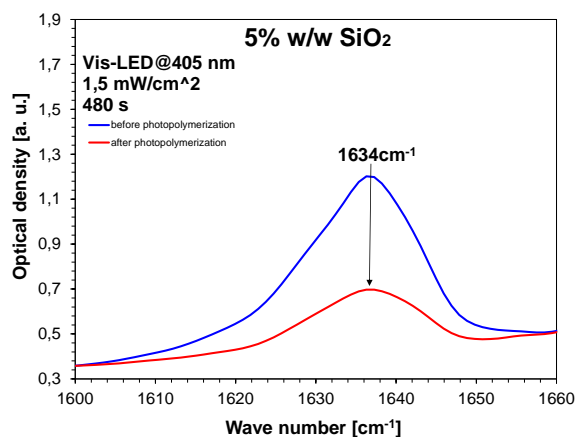

**Figure S53.** FT-IR spectra recorded before and after photopolymerization of nanocomposition polymerizing according to radical mechanism with 5% wt. SiO<sub>2</sub> for a 25  $\mu$ m thick layer of the sample.

**Changes in FT-IR spectra showing band decay at 1620 cm<sup>-1</sup> wavenumber monitored for a cationic polymerizing composition for a test layer thickness of 25 μm.**

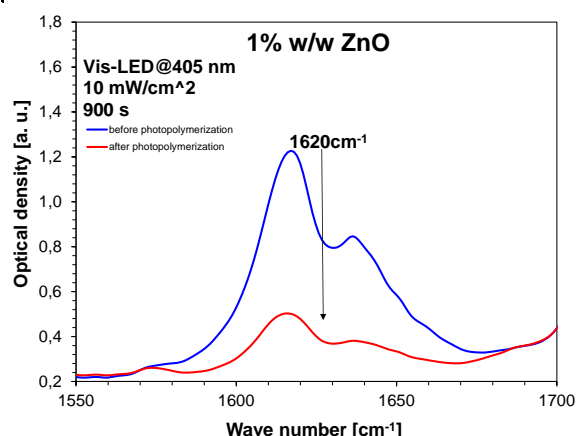

**Figure S54.** FT-IR spectra recorded before and after photopolymerization of nanocomposition polymerizing according to cationic mechanism with 1% wt. ZnO for a 25 μm thick layer of the sample.

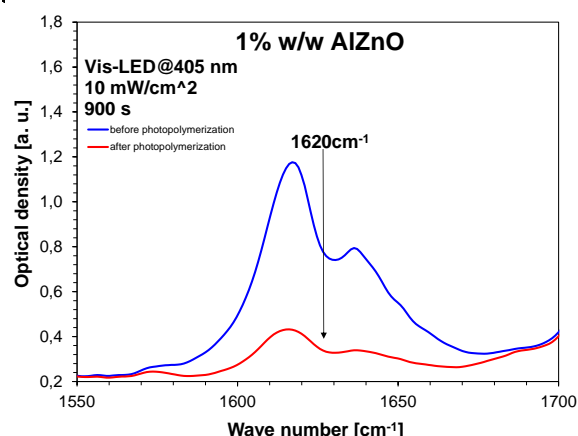

**Figure S55.** FT-IR spectra recorded before and after photopolymerization of nanocomposition polymerizing according to cationic mechanism with 1% wt. AlZnO for a 25 μm thick layer of the sample.

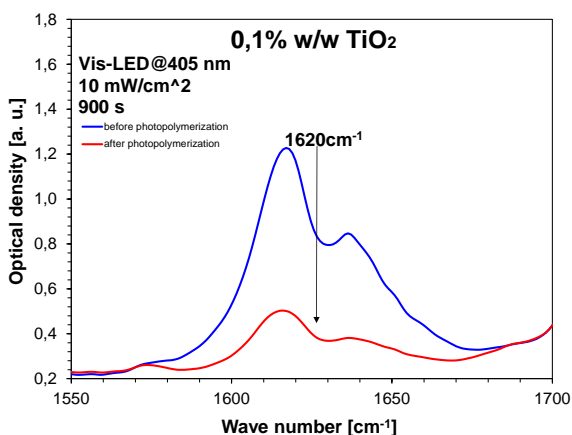

**Figure S56.** FT-IR spectra recorded before and after photopolymerization of nanocomposition polymerizing according to cationic mechanism with 0,1% wt. TiO<sub>2</sub> for a 25 μm thick layer of the sample.

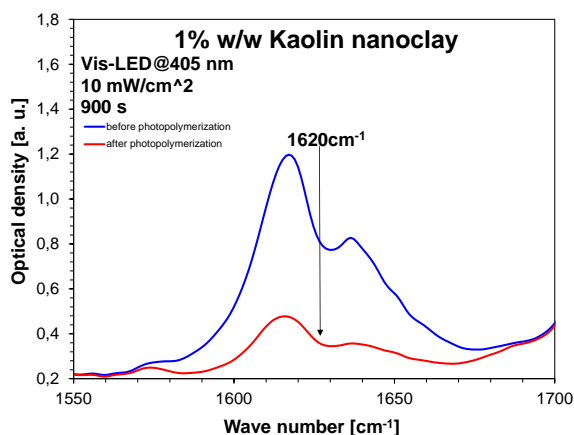

**Figure S57.** FT-IR spectra recorded before and after photopolymerization of nanocomposition polymerizing according to cationic mechanism with 1% wt. Kaolin nanoclay for a 25 μm thick layer of the sample.

**Changes in FT-IR spectra showing band decay at 6165  $\text{cm}^{-1}$  wavenumber monitored for a radical polymerizing composition for a test layer thickness of 1,4 mm.**

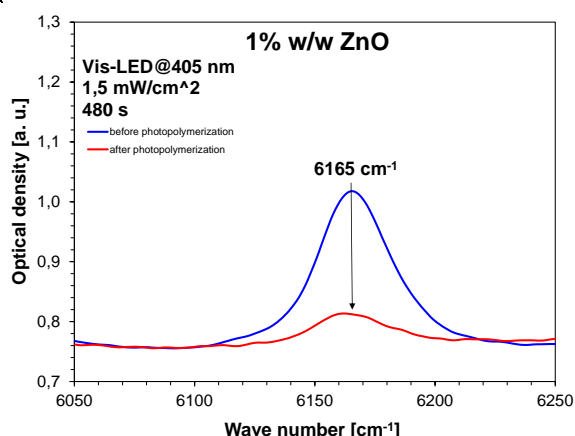

**Figure S58.** FT-IR spectra recorded before and after photopolymerization of nanocomposition polymerizing according to radical mechanism with 1% wt. ZnO for a 1,4 mm thick layer of the sample.

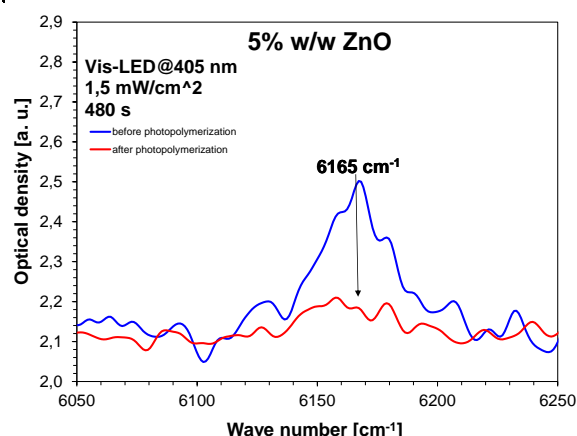

**Figure S59.** FT-IR spectra recorded before and after photopolymerization of nanocomposition polymerizing according to radical mechanism with 5% wt. ZnO for a 1,4 mm thick layer of the sample.

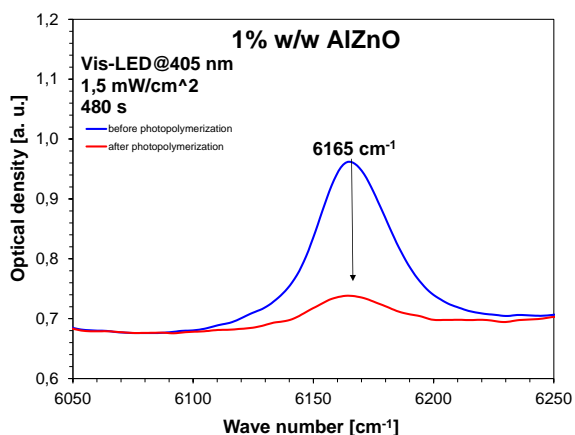

**Figure S60.** FT-IR spectra recorded before and after photopolymerization of nanocomposition polymerizing according to radical mechanism with 1% wt. AlZnO for a 1,4 mm thick layer of the sample.

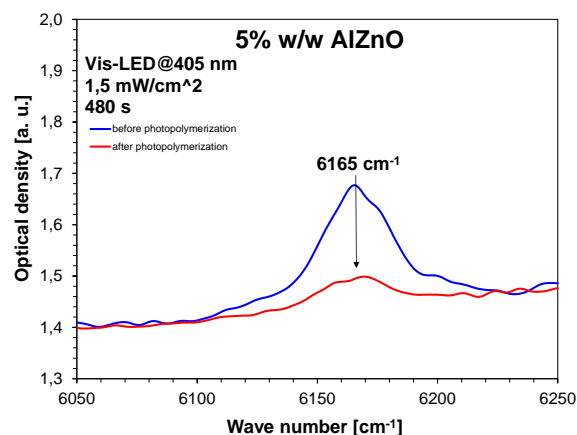

**Figure S61.** FT-IR spectra recorded before and after photopolymerization of nanocomposition polymerizing according to radical mechanism with 5% wt. AlZnO for a 1,4 mm thick layer of the sample.

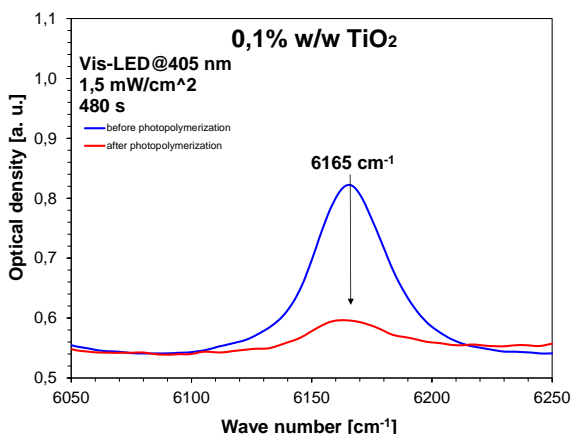

**Figure S62.** FT-IR spectra recorded before and after photopolymerization of nanocomposition polymerizing according to radical mechanism with 0,1% wt.  $\text{TiO}_2$  for a 1,4 mm thick layer of the sample.

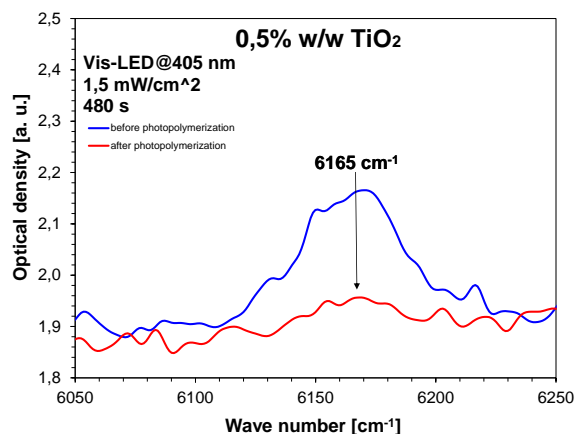

**Figure S63.** FT-IR spectra recorded before and after photopolymerization of nanocomposition polymerizing according to radical mechanism with 0,5% wt.  $\text{TiO}_2$  for a 1,4 mm thick layer of the sample.

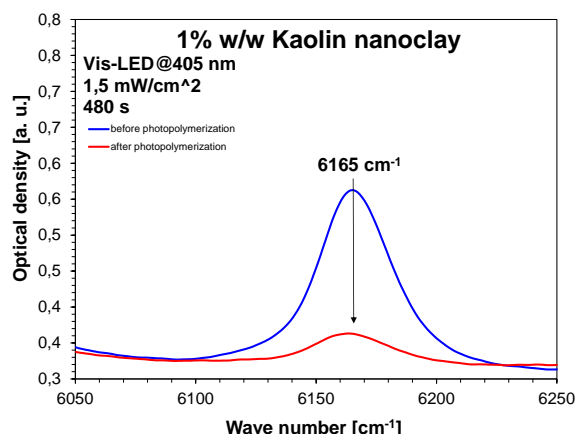

**Figure S64.** FT-IR spectra recorded before and after photopolymerization of nanocomposition polymerizing according to radical mechanism with 1% wt. Kaolin nanoclay for a 1,4 mm thick layer of the sample.

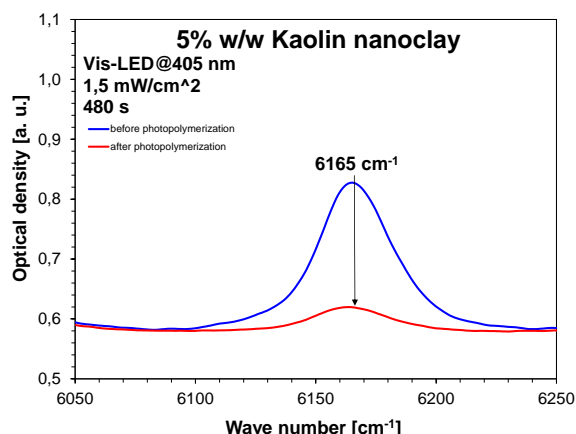

**Figure S65.** FT-IR spectra recorded before and after photopolymerization of nanocomposition polymerizing according to radical mechanism with 5% wt. Kaolin nanoclay for a 1,4 mm thick layer of the sample.

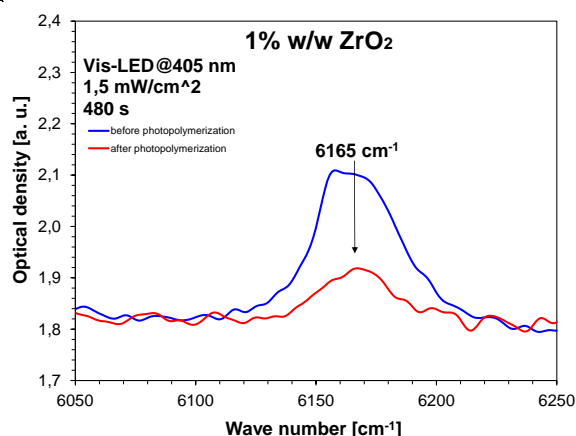

**Figure S66.** FT-IR spectra recorded before and after photopolymerization of nanocomposition polymerizing according to radical mechanism with 1% wt. ZrO<sub>2</sub> for a 1,4 mm thick layer of the sample.

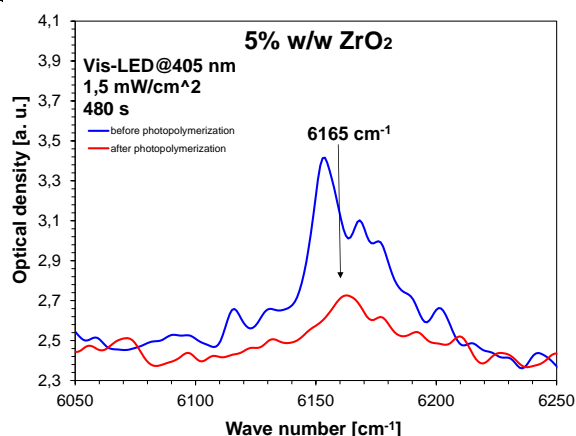

**Figure S67.** FT-IR spectra recorded before and after photopolymerization of nanocomposition polymerizing according to radical mechanism with 5% wt. ZrO<sub>2</sub> for a 1,4 mm thick layer of the sample.

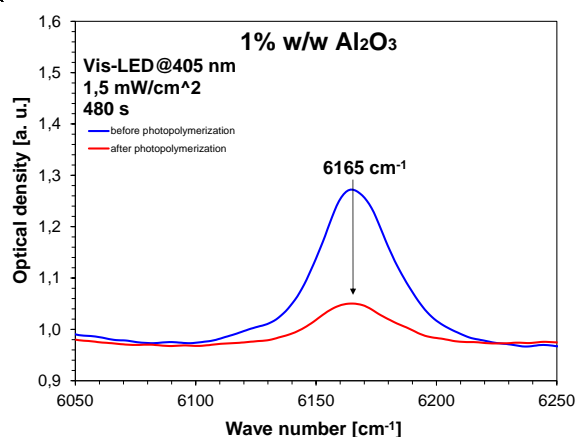

**Figure S68.** FT-IR spectra recorded before and after photopolymerization of nanocomposition polymerizing according to radical mechanism with 1% wt. Al<sub>2</sub>O<sub>3</sub> for a 1,4 mm thick layer of the sample.

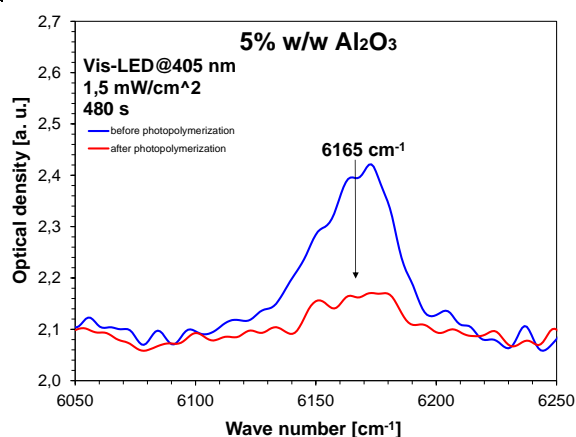

**Figure S69.** FT-IR spectra recorded before and after photopolymerization of nanocomposition polymerizing according to radical mechanism with 5% wt. Al<sub>2</sub>O<sub>3</sub> for a 1,4 mm thick layer of the sample.

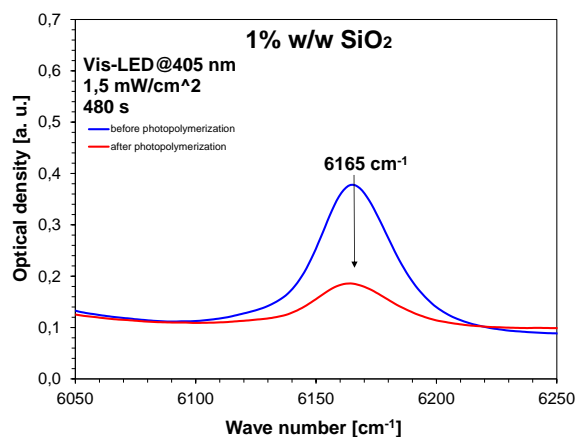

**Figure S70.** FT-IR spectra recorded before and after photopolymerization of nanocomposition polymerizing according to radical mechanism with 1% wt. SiO<sub>2</sub> for a 1,4 mm thick layer of the sample.

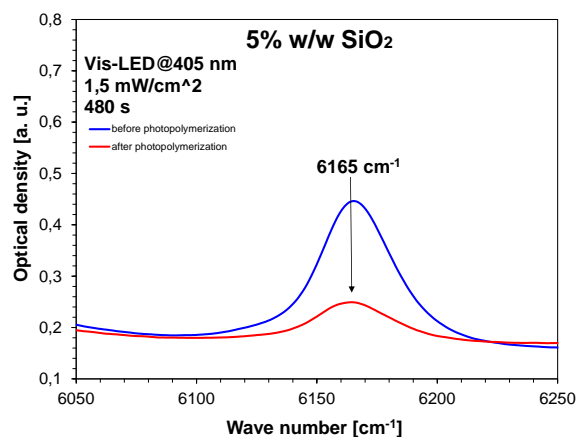

**Figure S71.** FT-IR spectra recorded before and after photopolymerization of nanocomposition polymerizing according to radical mechanism with 5% wt. SiO<sub>2</sub> for a 1,4 mm thick layer of the sample.

**Changes in FT-IR spectra showing band decay at  $6165\text{ cm}^{-1}$  wavenumber monitored for a cationic polymerizing composition for a test layer thickness of 1,4 mm.**

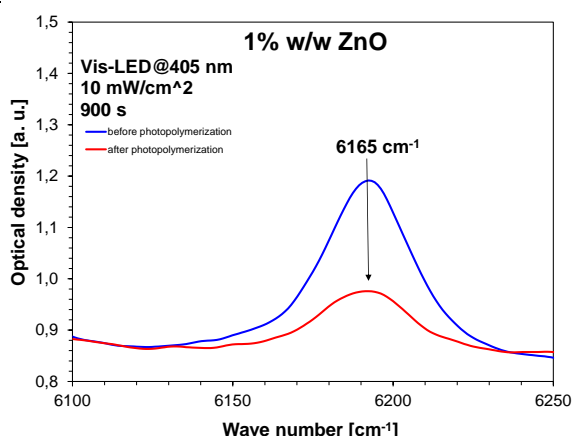

**Figure S72.** FT-IR spectra recorded before and after photopolymerization of nanocomposition polymerizing according to cationic mechanism with 1% wt. ZnO for a 1,4 mm thick layer of the sample.

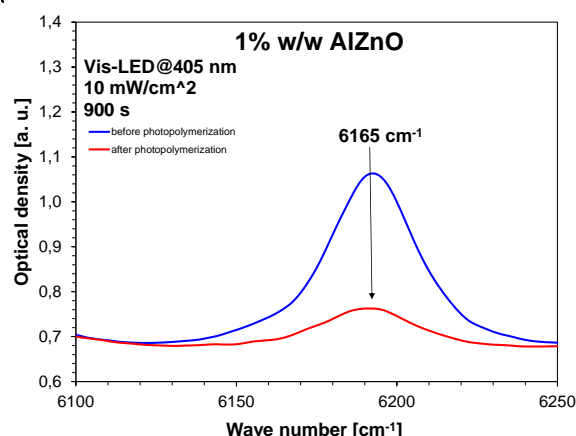

**Figure S73.** FT-IR spectra recorded before and after photopolymerization of nanocomposition polymerizing according to cationic mechanism with 1% wt. AlZnO for a 1,4 mm thick layer of the sample.

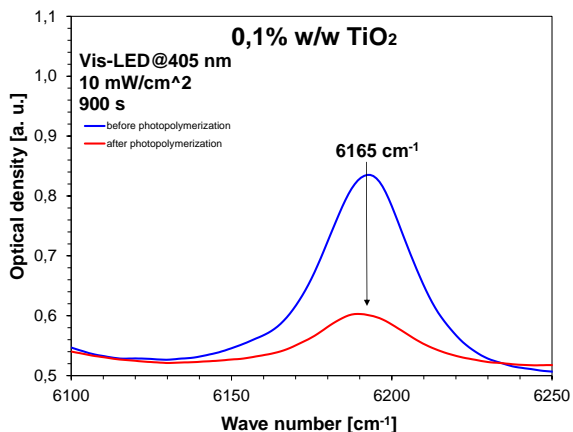

**Figure S74.** FT-IR spectra recorded before and after photopolymerization of nanocomposition polymerizing according to cationic mechanism with 0,1% wt. TiO<sub>2</sub> for a 1,4 mm thick layer of the sample.

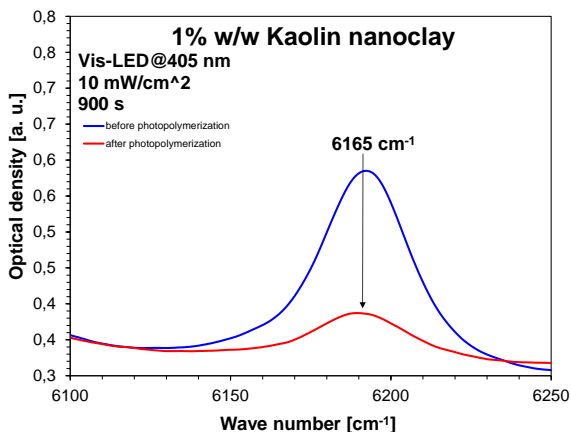

**Figure S75.** FT-IR spectra recorded before and after photopolymerization of nanocomposition polymerizing according to cationic mechanism with 1% wt. Kaolin nanoclay for a 1,4 mm thick layer of the sample.

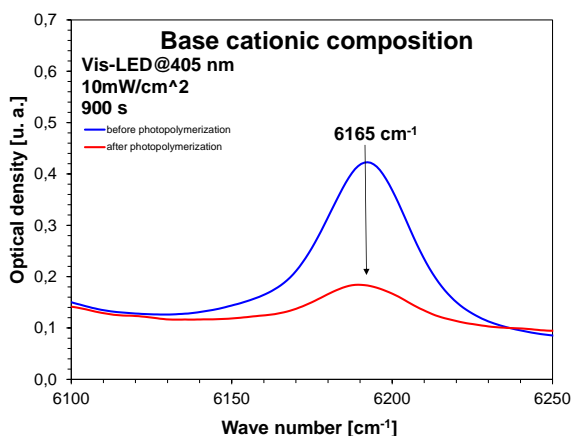

**Figure S76.** FT-IR spectra recorded before and after photopolymerization of nanocomposition polymerizing according to cationic mechanism for a 1,4 mm thick layer of the sample.



Cube models made using 3D printing from selected radical nanocompositions.

The photos in the green frame were taken with a standard camera.

The photos in the red frame were taken with an Olympus DSX1000 digital microscope.

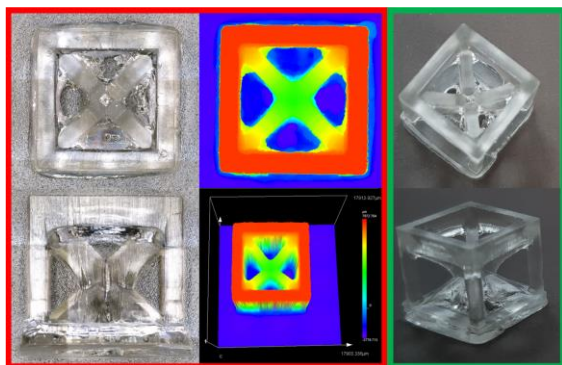

Figure S77. Printed from a base radical-reactive composition.

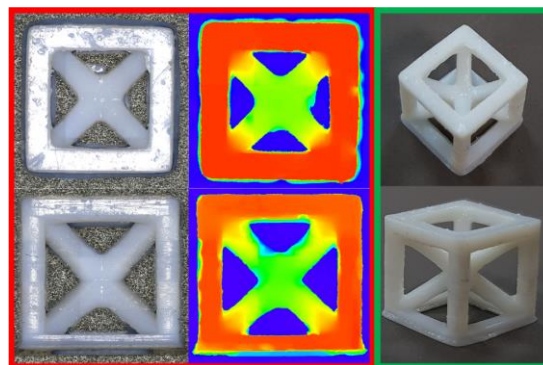

Figure S78. Printed from a radical-reactive composition with 5% wt. ZnO.

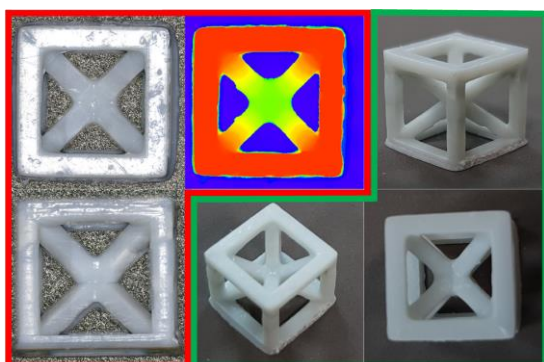

Figure S79. Printed from a radical-reactive composition with 5% wt. AlZnO.

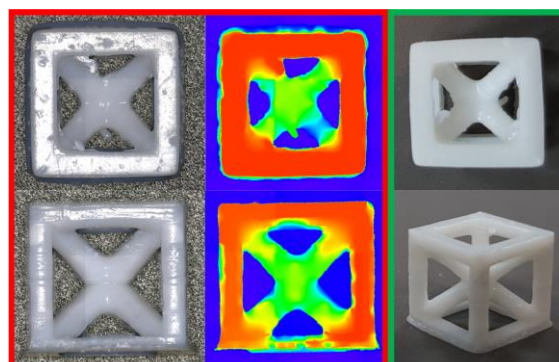

Figure S80. Printed from a radical-reactive composition with 5% wt. ZrO<sub>2</sub>.

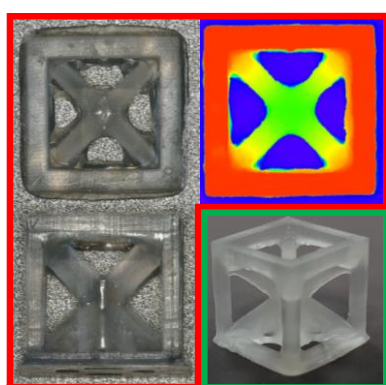

Figure S81. Printed from a radical-reactive composition with 5% wt. Kaolin nanoclay.

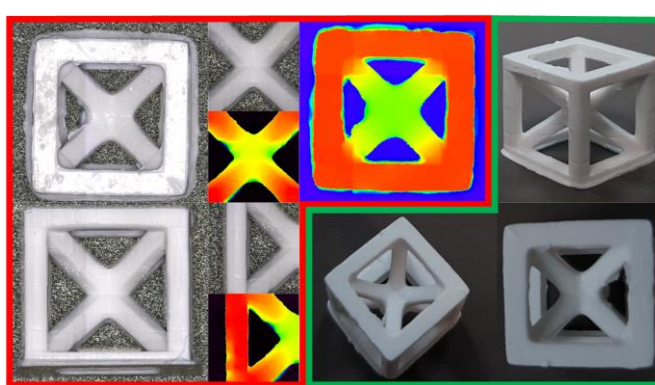

Figure S82. Printed from a radical-reactive composition with 5% wt. TiO<sub>2</sub>.

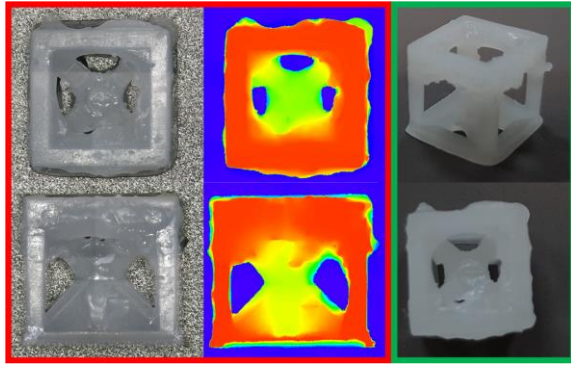

**Figure S83.** Printed from a radical-reactive composition with 5% wt.  $\text{Al}_2\text{O}_3$ .

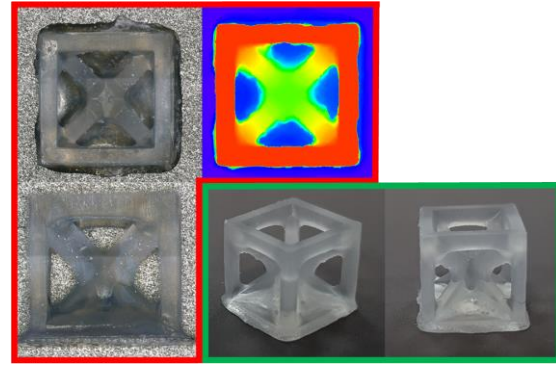

**Figure S84.** Printed from a radical-reactive composition with 5% wt.  $\text{SiO}_2$ .

**Visualization of the roughness and waviness of the test area of the 3D prints.**

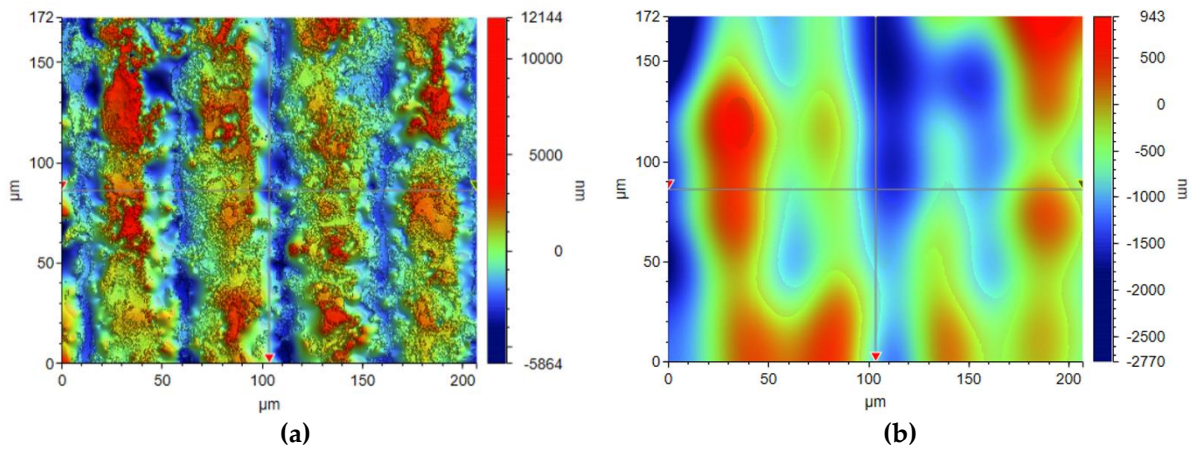

**Figure S85.** Visualization of the roughness (a) and waviness (b) of the test area of the print from the nanocomposition containing 5% by weight Kaolin nanoclay. The tests were done in alignment A according to Figure 3.

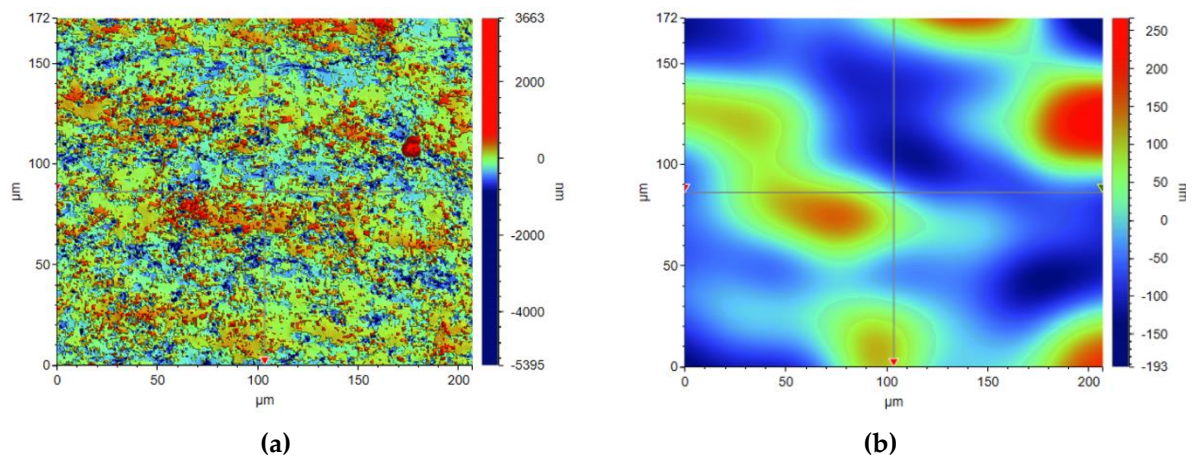

**Figure S86.** Visualization of the roughness (a) and waviness (b) of the test area of the print from the nanocomposition containing 5% by weight  $\text{TiO}_2$ . The tests were done in alignment B according to Figure 3.



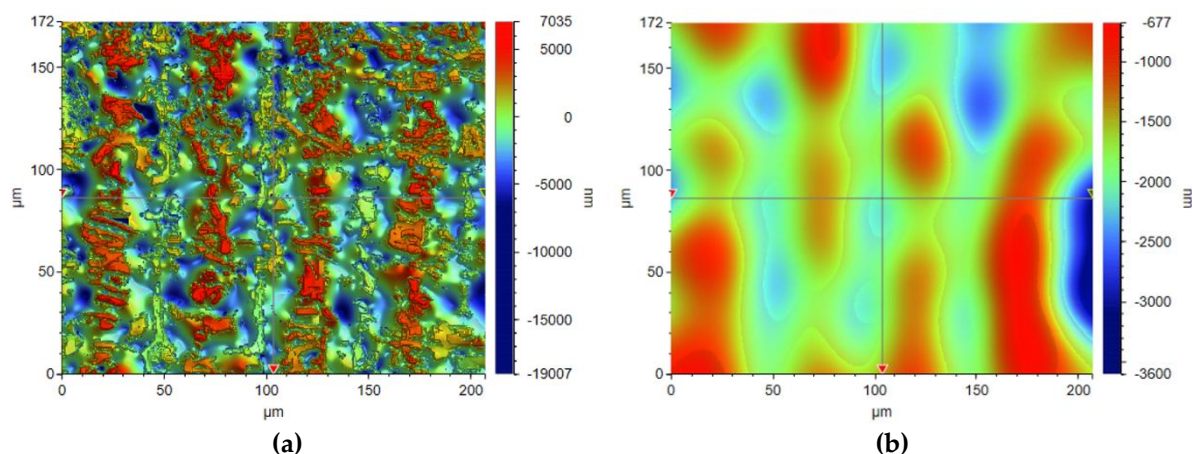

**Figure S87.** Visualization of the roughness (a) and waviness (b) of the test area of the print from the radical base composition. The tests were done in alignment A according to Figure 3.

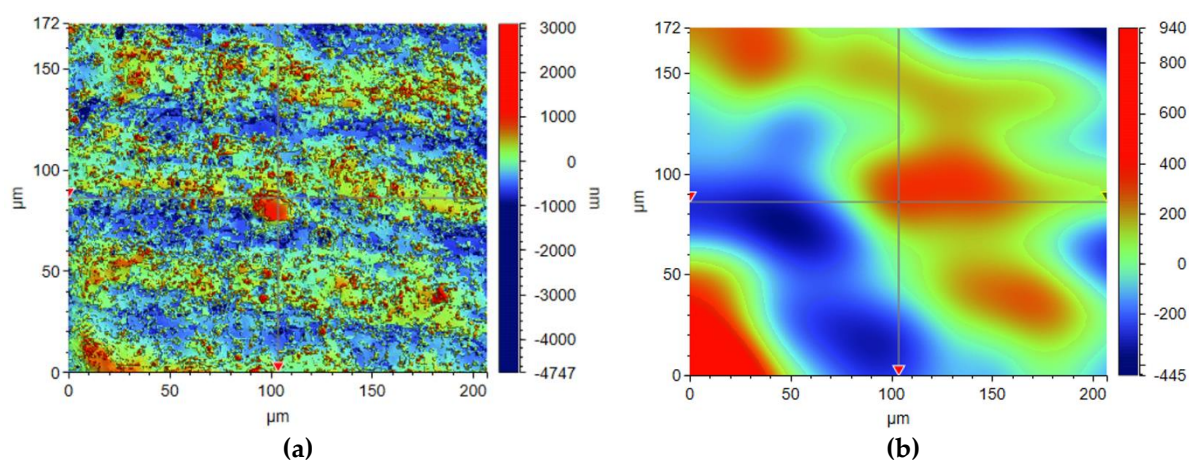

**Figure S88.** Visualization of the roughness (a) and waviness (b) of the test area of the print from the nanocomposition containing 5% by weight ZnO. The tests were done in alignment B according to Figure 3.

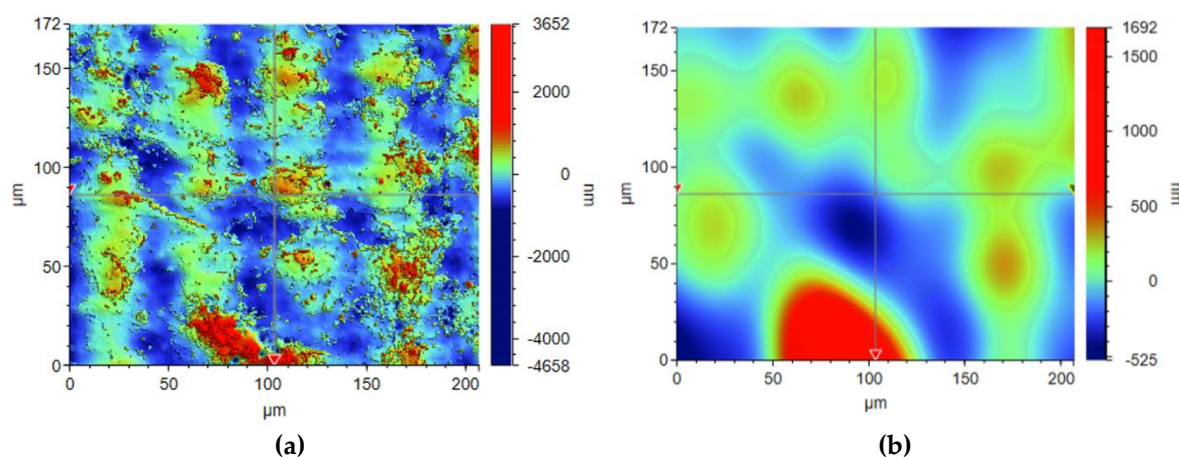

**Figure S89.** Visualization of the roughness (a) and waviness (b) of the test area of the print from the nanocomposition containing 5% by weight ZrO<sub>2</sub>. The tests were done in alignment A according to Figure 3.

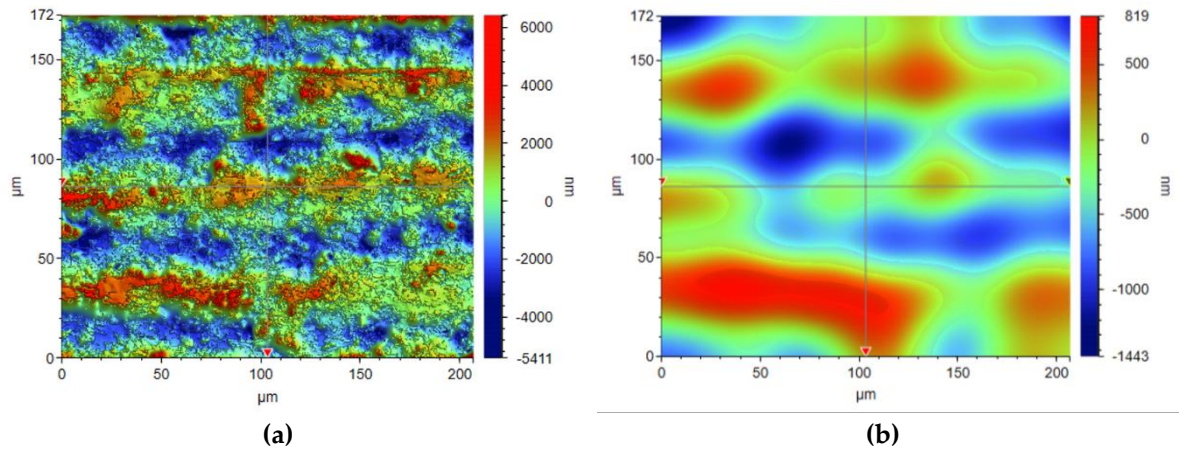

**Figure S90.** Visualization of the roughness (a) and waviness (b) of the test area of the print from the nanocomposition containing 5% by weight  $\text{Al}_2\text{O}_3$ . The tests were done in alignment B according to Figure 3.

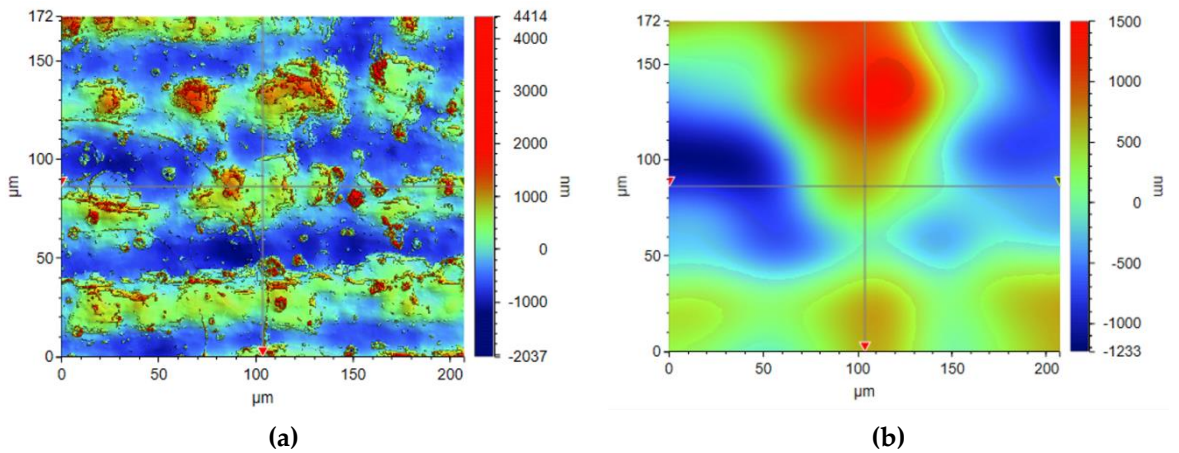

**Figure S91.** Visualization of the roughness (a) and waviness (b) of the test area of the print from the nanocomposition containing 5% by weight  $\text{AlZnO}$ . The tests were done in alignment B according to Figure 3.

### Analysis of the height of the tested surface of the 3D prints.

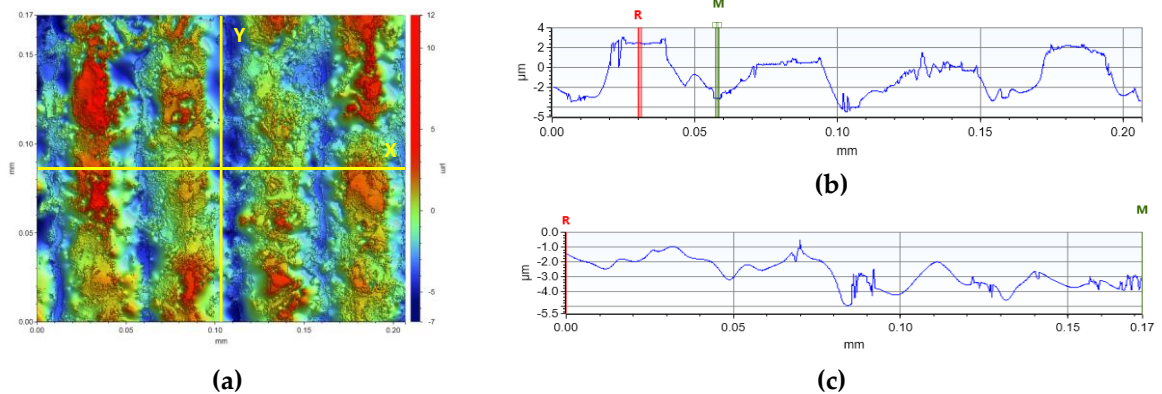

**Figure S92.** Analysis of the height of the tested surface of the 3D print (a) from the polymer nanocomposite containing 5% by weight of kaolin nanoclay in the (b) X-axis ( $\Delta X=0,0283$  mm,  $\Delta Z=-5,5671$   $\mu\text{m}$ ) and in the (c) Y-axis ( $\Delta X=0,1722$  mm,  $\Delta Z=-1,9012$   $\mu\text{m}$ ).



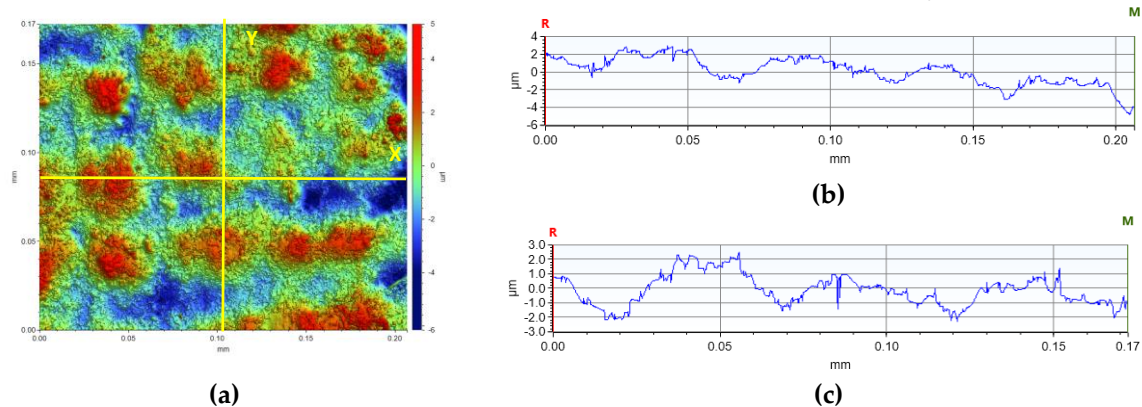

**Figure S93.** Analysis of the height of the tested surface of the 3D print (a) from the polymer nanocomposite containing 5% by weight of SiO<sub>2</sub> in the (b) X-axis ( $\Delta X=0,2067$  mm,  $\Delta Z= -5,7650$  μm) and in the (c) Y-axis ( $\Delta X=0,1722$  mm,  $\Delta Z= -1,4788$  μm).

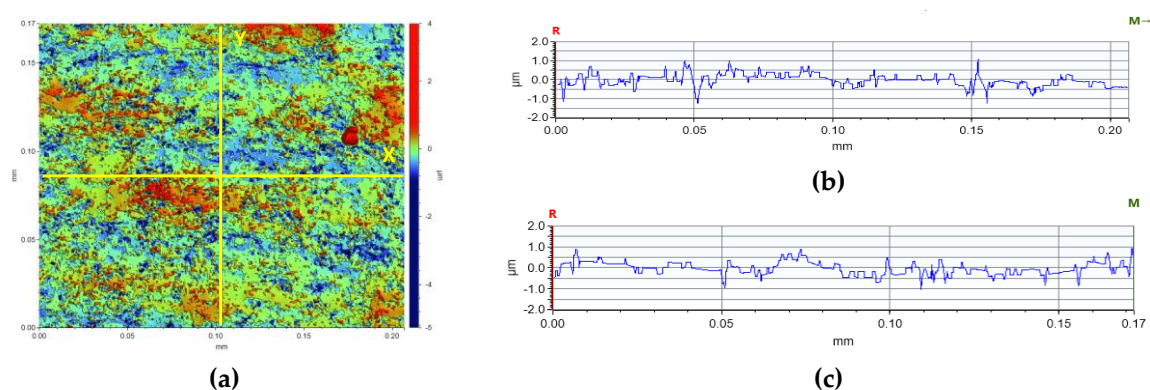

**Figure S94.** Analysis of the height of the tested surface of the 3D print (a) from the polymer nanocomposite containing 5% by weight of TiO<sub>2</sub> in the (b) X-axis ( $\Delta X=0,2067$  mm,  $\Delta Z= -0,1486$  μm) and in the (c) Y-axis ( $\Delta X=0,1722$  mm,  $\Delta Z= 0,8160$  μm).

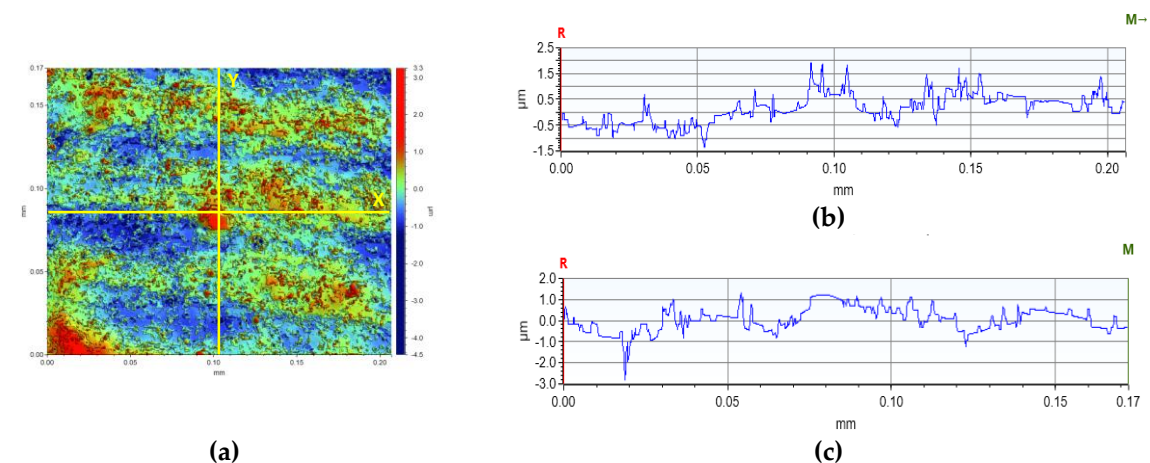

**Figure S95.** Analysis of the height of the tested surface of the 3D print (a) from the polymer nanocomposite containing 5% by weight of ZnO in the (b) X-axis ( $\Delta X=0,2067$  mm,  $\Delta Z= 0,9929$  μm) and in the (c) Y-axis ( $\Delta X=0,1722$  mm,  $\Delta Z= -0,2589$  μm).

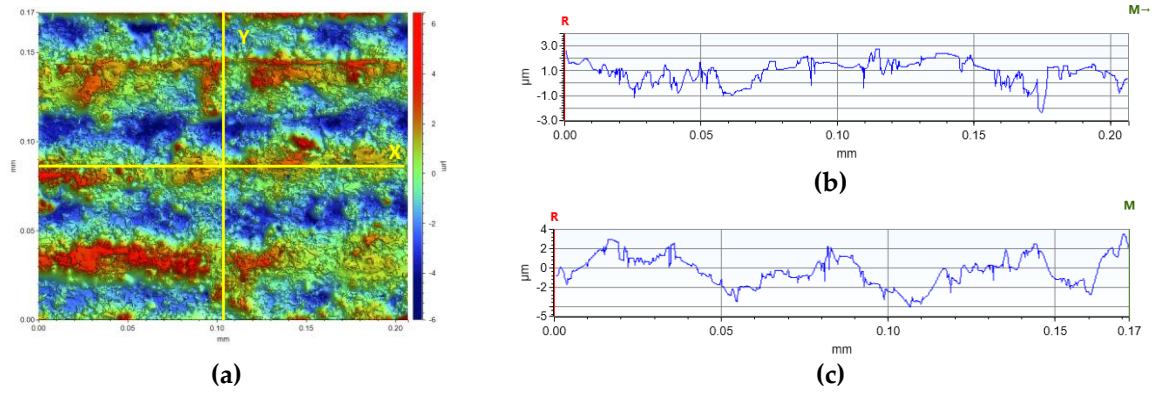

**Figure S96.** Analysis of the height of the tested surface of the 3D print (a) from the polymer nanocomposite containing 5% by weight of  $\text{Al}_2\text{O}_3$  in the (b) X-axis ( $\Delta X=0,2067$  mm,  $\Delta Z= -2,3823$   $\mu\text{m}$ ) and in the (c) Y-axis ( $\Delta X=0,1722$  mm,  $\Delta Z= 3,2009$   $\mu\text{m}$ ).

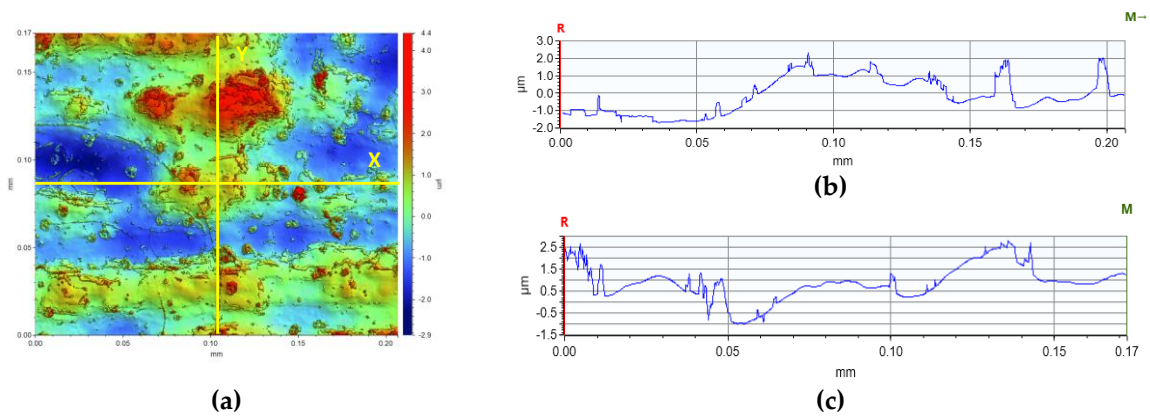

**Figure S97.** Analysis of the height of the tested surface of the 3D print (a) from the polymer nanocomposite containing 5% by weight of  $\text{AlZnO}$  in the (b) X-axis ( $\Delta X=0,2067$  mm,  $\Delta Z= 1,0202$   $\mu\text{m}$ ) and in the (c) Y-axis ( $\Delta X=0,1722$  mm,  $\Delta Z= -0,7574$   $\mu\text{m}$ ).

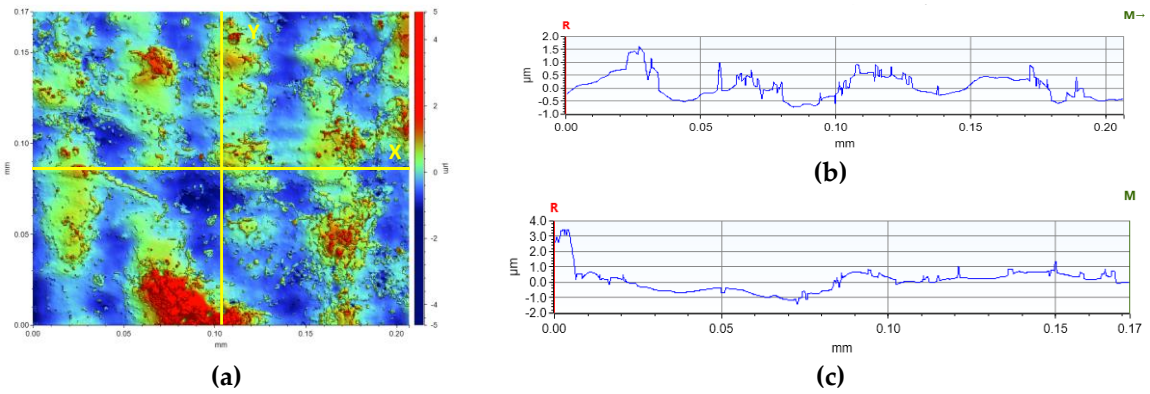

**Figure S98.** Analysis of the height of the tested surface of the 3D print (a) from the polymer nanocomposite containing 5% by weight of  $\text{ZrO}_2$  in the (b) X-axis ( $\Delta X=0,2067$  mm,  $\Delta Z= -0,1296$   $\mu\text{m}$ ) and in the (c) Y-axis ( $\Delta X=0,1722$  mm,  $\Delta Z= -2,8353$   $\mu\text{m}$ ).
